# Supplementary material
Source: publisher figshare collection journal article supplement (https://tandf.figshare.com/ndownloader/files/22643300)
Supplement: Supplementary file 1 [file 22643300]

## Supplementary Material

Table 1: Selected catchment descriptors and landscape metrics: definition, explanation and derivation.

| Descriptor/<br>Metric            | Definition                                                                                                                                                                                              | Explanation                                                                                                                                                                                                                                                       | Parameters                                                                                                                                                      |
|----------------------------------|---------------------------------------------------------------------------------------------------------------------------------------------------------------------------------------------------------|-------------------------------------------------------------------------------------------------------------------------------------------------------------------------------------------------------------------------------------------------------------------|-----------------------------------------------------------------------------------------------------------------------------------------------------------------|
| <b>FEH catchment descriptors</b> |                                                                                                                                                                                                         |                                                                                                                                                                                                                                                                   |                                                                                                                                                                 |
| <b>Area</b>                      |                                                                                                                                                                                                         | Catchment drainage area<br>(km <sup>2</sup> )                                                                                                                                                                                                                     | A = Area of catchment                                                                                                                                           |
| <b>SAAR</b>                      | $\frac{\sum_{i=1961}^{1990} P_i}{30}$                                                                                                                                                                   | Standard-period Average<br>Annual Rainfall (mm) rainfall<br>for the period 1961-1990 in<br>Great Britain and Northern<br>Ireland                                                                                                                                  | P = Precipitation (annual total)                                                                                                                                |
| <b>FARL</b>                      | $FARL = \prod_{i \in} \alpha_i$ <p>where:</p> $\alpha = (1 - \sqrt{r})^w$ $r = \frac{\text{water surface area}}{\text{subcatchment area}}$ $w = \frac{\text{subcatchment area}}{\text{catchment area}}$ | Index of flood attenuation<br>from rivers and lakes. The<br>overall <i>FARL</i> index has a value<br>close to one when a<br>catchment has low<br>attenuation from water<br>bodies, and as attenuation<br>effects become more<br>important the index<br>decreases. | A = effect of individual water body<br><br>r = relative size of water body to upstream<br>catchment<br><br>w = weighting reflecting importance of<br>water body |
| <b>BFIHOST</b>                   | Estimate of base flow index (BFI) assigned<br>from catchment area weighted 1km gridded<br>HOST classes                                                                                                  | Base flow index from<br>Hydrology of Soil Types<br>(HOST) Boorman et al. (1995)                                                                                                                                                                                   |                                                                                                                                                                 |

|                                      |                                                                                                      |                                                                                                                                                                               |                                                                                                                                                                                                                              |
|--------------------------------------|------------------------------------------------------------------------------------------------------|-------------------------------------------------------------------------------------------------------------------------------------------------------------------------------|------------------------------------------------------------------------------------------------------------------------------------------------------------------------------------------------------------------------------|
| <b>URBEXT</b>                        | $URBEXT = Urban + 0.5 Suburban$                                                                      | FEH index of fractional urban extent                                                                                                                                          | <i>Urban</i> and <i>Suburban</i> are Land Cover Mapping (LCM) classes for urbanised surfaces                                                                                                                                 |
| <b>PROPWET</b>                       | $\frac{\sum_{i=1961}^{1990} \text{No. days SMD} > 6\text{mm}}{\sum_{i=1961}^{1990} \text{No. days}}$ | Index of proportion of time that soils are wet (%)                                                                                                                            | SMD = soil moisture deficit (as calculated on last day of month and linearly interpolated)                                                                                                                                   |
| <b>DPLBAR</b>                        | Mean distance of all 10m DEM grids to catchment outlet                                               | Mean drainage path length                                                                                                                                                     | NEXTmap Digital Elevation Model (10m)                                                                                                                                                                                        |
| <b>DPSBAR</b>                        | Mean slope between all 10m DEM grids - based on steepest route – within catchment                    | Mean drainage path slope                                                                                                                                                      | NEXTmap Digital Elevation Model (10m)                                                                                                                                                                                        |
| <b>Class based landscape metrics</b> |                                                                                                      |                                                                                                                                                                               |                                                                                                                                                                                                                              |
| <b>Contiguity Index</b>              | $CONTIG = \frac{\left[ \frac{\sum_{r=1}^z c_{ijr}}{a_{ij}} \right]}{v - 1}$                          | Assesses the spatial connectedness, or contiguity, of cells within a grid-cell patch to provide an index of patch boundary configuration and thus patch shape                 | $c_{ijr}$ = contiguity value for pixel <i>r</i> in patch <i>ij</i> .<br><br><i>V</i> = sum of the values in a 3-by-3 cell template (13 in this case).<br><br>$A_{ij}$ = area of patch <i>ij</i> in terms of number of cells. |
| <b>Largest Patch Index</b>           | $LPI = \frac{\max(a_{ij})}{A} (100)$                                                                 | <i>Largest patch index</i> at the class level quantifies the percentage of total landscape area comprised by the largest patch. As such, it is a simple measure of dominance. | $a_{ij}$ = area (m <sup>2</sup> ) of patch <i>ij</i> .<br><br><i>A</i> = total landscape area (m <sup>2</sup> ).                                                                                                             |
| <b>Clumpiness index</b>              | Given:<br>$G_i = \left( \frac{g_{ii}}{(\sum_{i=1}^m g_{ii}) - mine_i} \right)$                       | The proportional deviation of the proportion of like adjacencies involving the corresponding class from that                                                                  | $g_{ii}$ = number of like adjacencies (joins) between pixels of patch type (class) <i>i</i> based on the <i>double-count</i> method.                                                                                         |

|                          |                                                                                                                                             |                                                                                                                                                                        |                                                                                                                                                                                                                                                                                                                                                                              |
|--------------------------|---------------------------------------------------------------------------------------------------------------------------------------------|------------------------------------------------------------------------------------------------------------------------------------------------------------------------|------------------------------------------------------------------------------------------------------------------------------------------------------------------------------------------------------------------------------------------------------------------------------------------------------------------------------------------------------------------------------|
|                          | $CLUMPY = \left[ \frac{G_i - P_i}{P_i} \text{ for } G_i < P_i \& P_i < 5, e; \text{ else } \frac{G_i - P_i}{1 - P_i} \right]$               | <p>expected under a spatially random distribution.</p>                                                                                                                 | <p><math>G_{ik}</math> = number of adjacencies (joins) between pixels of patch types (classes) i and k based on the <i>double-count</i> method.</p> <p>Min-e<sub>i</sub> = minimum perimeter (in number of cell surfaces) of patch type (class) i for a maximally clumped class.</p> <p><math>P_i</math> = proportion of the landscape occupied by patch type (class) i.</p> |
| <b>Cohesion</b>          | $COHESION = \left[ 1 - \frac{\sum_{j=1}^n p_{ij}}{\sum_{j=1}^n p_{ij} \sqrt{a_{ij}}} \right] \left[ 1 - \frac{1}{\sqrt{A}} \right]^1 (100)$ | <p><i>Patch cohesion index</i> measures the physical connectedness of the corresponding patch type.</p>                                                                | <p><math>p_{ij}</math> = perimeter of patch ij in terms of number of cell surfaces</p> <p><math>a_{ij}</math> = area of patch ij in terms of number of cells.</p> <p>A = total number of cells in the landscape.</p>                                                                                                                                                         |
| <b>Landscape metrics</b> |                                                                                                                                             |                                                                                                                                                                        |                                                                                                                                                                                                                                                                                                                                                                              |
| <b>Contagion Index</b>   | $CONTAG = 1 + \sum \sum [q_{ij} \ln(q_{ij})] / 2 \ln(2)$                                                                                    | <p>Assesses the extent to which patch types are aggregated or clumped as a percentage of the maximum possible; characterised by high dispersion and interspersion.</p> | <p><math>P_i</math> = proportion of the landscape occupied by patch type (class) i.</p> <p><math>g_{ik}</math> = number of adjacencies (joins) between pixels of patch types (classes) i and k based on the <i>double-count</i> method.</p> <p>m = number of patch types (classes) present in the landscape, including the landscape border if present.</p>                  |
| <b>PX</b>                | $PX = \sum A_k / mdo_k$                                                                                                                     | <p>Proximity Index (PX) accounts for hydrological distance and connectivity of all suburban and urban patches relative to catchment outlet</p>                         | <p><math>A_k</math> = area of patch k,</p> <p><math>mdo_k</math> = mean distance to the outlet of patch k</p>                                                                                                                                                                                                                                                                |
